# Supplementary material for: Interrogating Emergent Transport Properties for Molecular Motor Ensembles: A Semi-analytical Approach
Source: PLOS journal article supplement (doi:10.1371/journal.pcbi.1005152), 2016-11-03
Supplement: S4 (10.1371/journal.pcbi.1005152.s004) [file journal.pcbi.1005152.s004]

# Supporting Information Figure S1

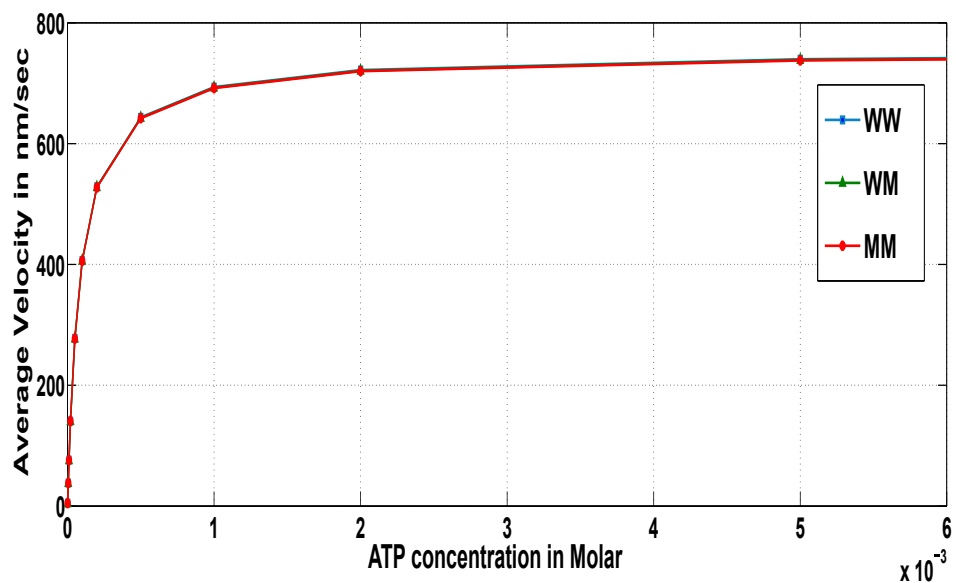

Figure 1: Effect of ATP concentration on average velocity for 2-motor ensembles WW, WM and MM against load force of 0.2  $pN$
