# Supplementary material for: Interrogating Emergent Transport Properties for Molecular Motor Ensembles: A Semi-analytical Approach
Source: PLOS journal article supplement (doi:10.1371/journal.pcbi.1005152), 2016-11-03
Supplement: S6 (10.1371/journal.pcbi.1005152.s006) [file journal.pcbi.1005152.s006]

Supporting Information Figure S3

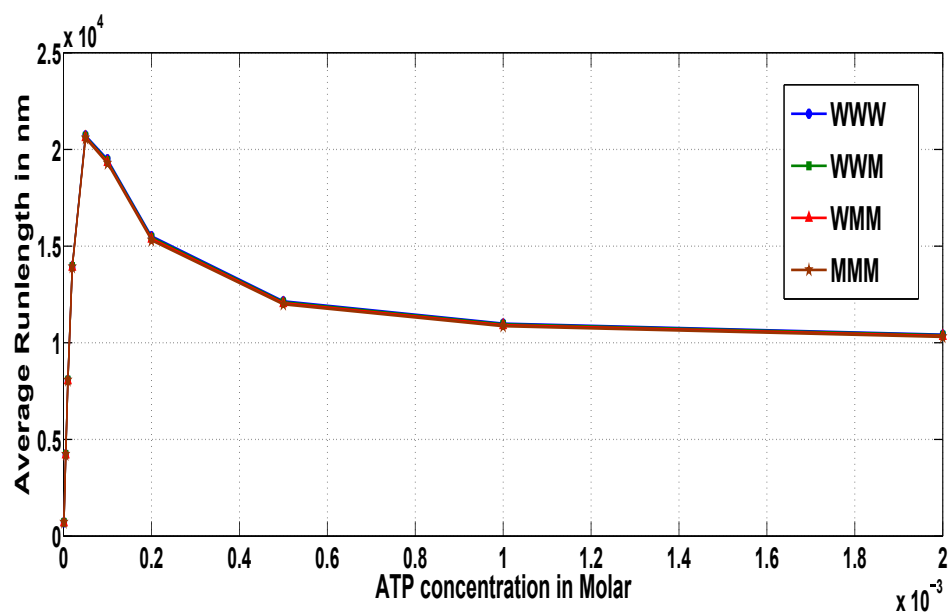

Figure 1: Effect of ATP concentration on average runlength for 3-motor ensembles WWW, WWM, WMM and MMM against load force of  $0.2 \text{ pN}$
